# Supplementary material for: A sensitive and specific histopathologic prognostic marker for H3F3A K27M mutant pediatric glioblastomas
Source: PubMed Central journal article supplement (PMC4201755; doi:10.1007/s00401-014-1338-3), 2014-09-09
Supplement: 401_2014_1338_MOESM1_ESM.pdf [file 401_2014_1338_MOESM1_ESM.pdf]

## Supplementary Information

### A sensitive and specific histopathologic prognostic marker for *H3F3A* K27M mutant pediatric glioblastomas.

Sriram Veneti<sup>1\*</sup>, Mariarita Santi<sup>2</sup>, Michelle Madden Felicella<sup>3</sup>, Dmitry Yarilin<sup>4</sup>, Joanna J. Phillips<sup>4</sup>, Lisa M Sullivan<sup>2</sup>, Daniel Martinez<sup>2</sup>, Arie Perry<sup>5</sup>, Peter W. Lewis<sup>6</sup>, Craig B. Thompson<sup>1</sup>, Alexander R. Judkins<sup>7\*</sup>

**Figure S1**

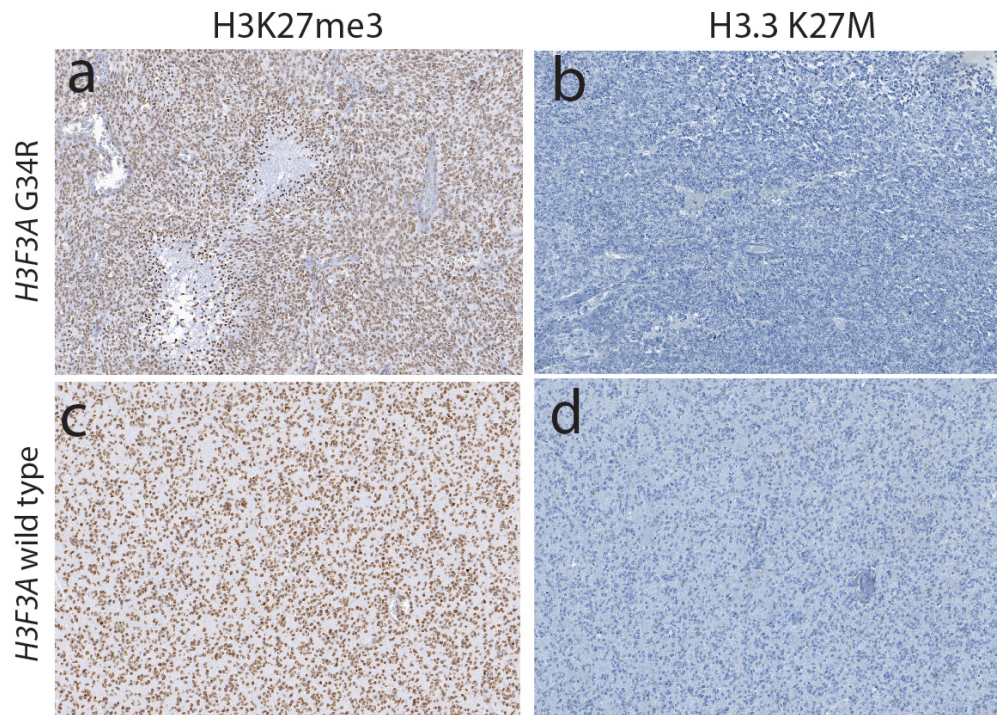

**Figure S1.**

**Figure 1. Comparison of H3K27me3 and H3.3 K27M in *H3F3A* G34R mutant and wild type pediatric GBM.**

**a and b.** Representative images from a *H3F3A* G34R mutant tumor, H3K27me3 (20X, a) and H3.3 K27M (20X, b).

**c and d.** Representative images from a *H3F3A* K27M wild type tumor, H3K27me3 (20X, c) and H3.3 K27M (20X, d).

**Figure S2**

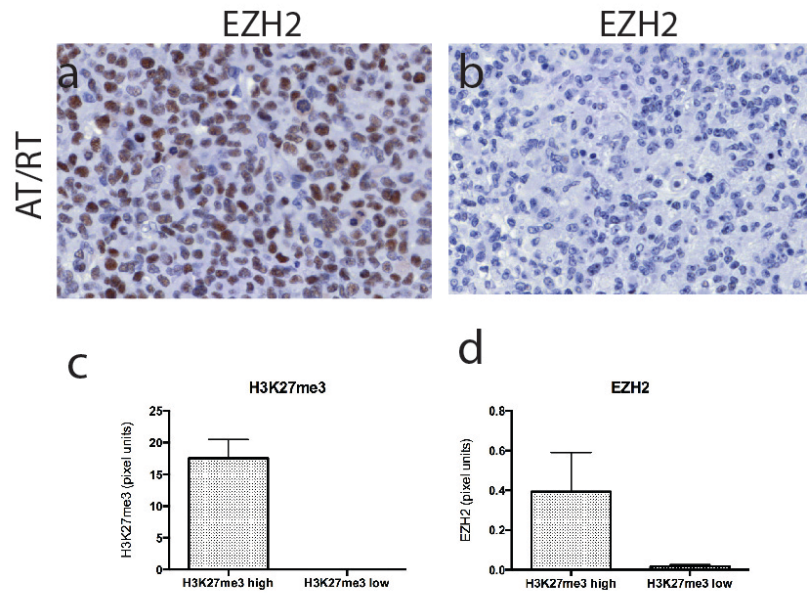

**Figure S2.** Differences in expression of EZH2 relate with differences in H3K27me3 in AT/RT.

- a. Representative image (40X) from an AT/RT case that showed high H3K27me3 and high EZH2 expression.
- b. Representative image (40X) from an AT/RT case with low H3K27me3 and low EZH2 expression
- c. Quantification of H3K27me3 in cases with high (n=21) and low (n=5) H3K27me3.
- d. Quantification of EZH2 in same cases with high (n=21) and low (n=5) H3K27me3.



**Figure S3**

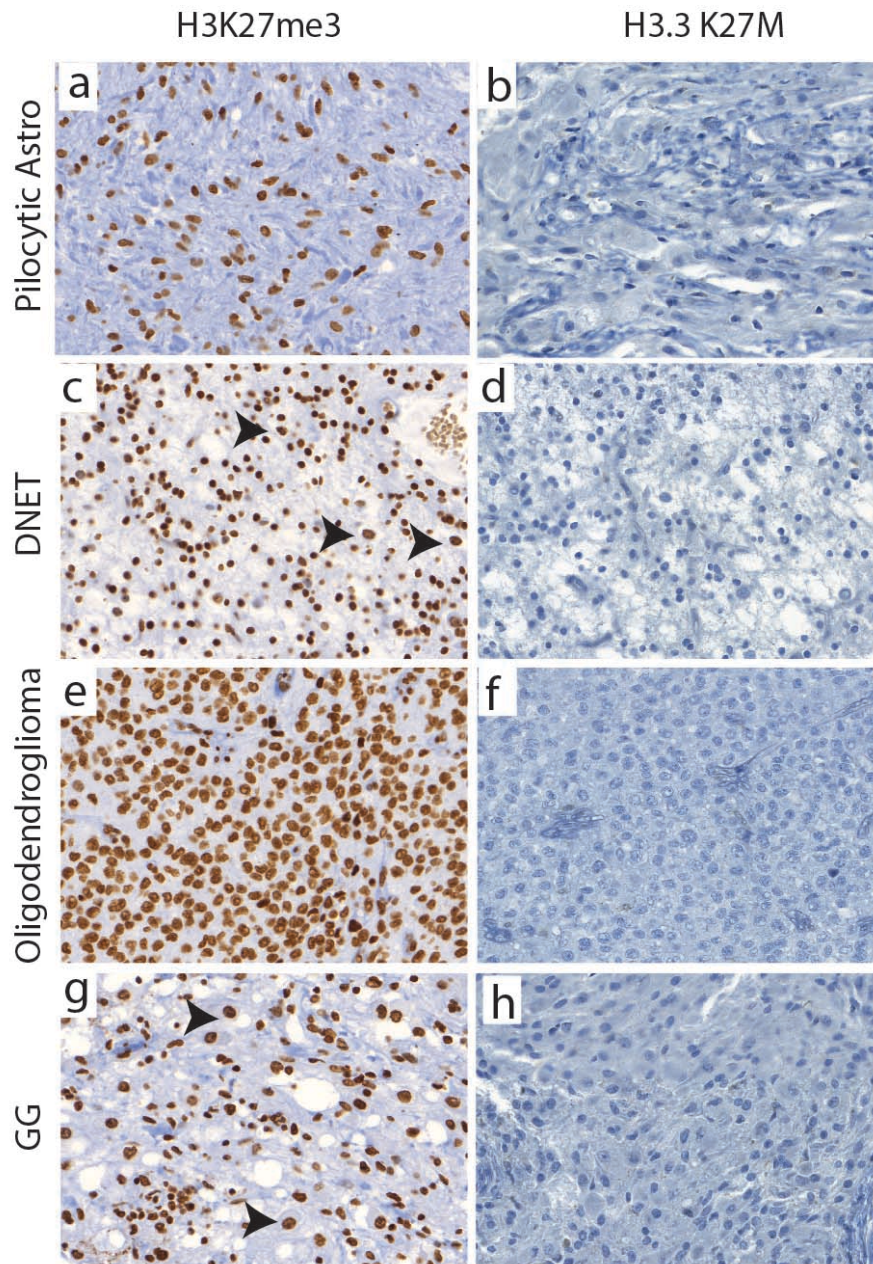

**Figure S3. Comparison of H3K27me3 and H3.3 K27M in low-grade pediatric gliomas and glioneuronal tumors.**

**a and b.** Representative images of H3K27me3 (40X, a) and H3.3 K27M (40X, b) in pilocytic astrocytoma

**c and d.** Representative images of H3K27me3 (40X, c) and H3.3 K27M (40X, d) in DNET (arrowheads indicate floating neurons).

**e and f.** Representative images of H3K27me3 (40X, e) and H3.3 K27M (40X, f)

in oligodendroglioma

**g and h.** Representative images of H3K27me3 (40X, g) and H3.3 K27M (40X, h) in ganglioglioma (GG, arrowheads indicate ganglion cells).

**Table S1**

| Case | Diagnosis | Sex | Age (years) | Location                | Sanger sequencing |           | Immunohistochemistry |              |
|------|-----------|-----|-------------|-------------------------|-------------------|-----------|----------------------|--------------|
|      |           |     |             |                         | H3F3A K27M        | H3F3A G34 | H3.3 K27M +ve        | H3K27me3 low |
| 1    | GBM       | M   | 8           | Cerebrum                | K27M              | no        | Pos                  | Yes          |
| 2    | GBM       | M   | 12          | Spinal cord, NOS        | K27M              | no        | Pos                  | Yes          |
| 3    | GBM       | M   | 4           | Frontal lobe            | K27M              | no        | Pos                  | Yes          |
| 4    | GBM       | F   | 7           | Thalamic                | K27M              | no        | Pos                  | Yes          |
| 5    | GBM       | F   | 15          | Bithalamic              | K27M              | no        | Pos                  | Yes          |
| 6    | GBM       | M   | 12          | Right Thalamus          | K27M              | no        | Pos                  | Yes          |
| 7    | GBM       | F   | 21          | Thalamus                | K27M              | no        | Pos                  | Yes          |
| 8    | AA        | M   | 11          | Left thalamus           | K27M              | no        | Pos                  | Yes          |
| 9    | GBM       | M   | 9           | Right cerebellum        | K27M              | no        | Pos                  | Yes          |
| 10   | GBM       | F   | 10          | Left occipital lobe     | K27M              | no        | Pos                  | Yes          |
| 11   | GBM       | F   | 14          | Spinal Cord             | K27M              | no        | Pos                  | Yes          |
| 12   | GBM       | M   | 9           | Cerebrum, NOS           | K27M              | no        | Pos                  | Yes          |
| 13   | GBM       | F   | 0           | Cerebrum, NOS           | no                | G34R      | Neg                  | No           |
| 14   | GBM       | M   | 32          | Spinal cord, NOS        | no                | no        | Neg                  | No           |
| 15   | GBM       | M   | 1           | Lateral ventricle       | no                | no        | Neg                  | No           |
| 16   | GBM       | F   | 18          | Frontal                 | no                | no        | Neg                  | No           |
| 17   | GBM       | F   | 18          | Supratentorial, NOS     | no                | no        | Neg                  | No           |
| 18   | GBM       | M   | 15          | Frontal lobe            | no                | no        | Neg                  | No           |
| 19   | GBM       | M   | 16          | Brainstem, cbl peduncle | no                | no        | Neg                  | No           |
| 20   | GBM       | M   | 4           | Parietal lobe           | no                | no        | Neg                  | No           |
| 21   | GBM       | F   | 5           | Frontal lobe            | no                | no        | Neg                  | No           |
| 22   | GBM       | F   | 8           | Temporal lobe           | no                | no        | Neg                  | No           |
| 23   | GBM       | M   | 7           | Right Temporal          | no                | no        | Neg                  | No           |
| 24   | GBM       | M   | 17          | Right Temporal          | no                | no        | Neg                  | No           |
| 25   | GBM       | M   | 8           | Left temporal           | no                | no        | Neg                  | No           |
| 26   | GBM       | F   | 17          | Left Post Temporal      | no                | no        | Neg                  | No           |
| 27   | GBM       | F   | 26          | Temporal lobe           | no                | no        | Neg                  | No           |
| 28   | AA        | M   | 7           | Right temporal lobe     | no                | no        | Neg                  | No           |
| 29   | AA        | F   | 14          | Right thalamus          | no                | no        | Neg                  | No           |
| 30   | AA        | M   | 13          | Right temporal          | no                | no        | Neg                  | No           |
| 32   | GBM       | F   | 7           | Left thalamus           | no                | no        | Neg                  | No           |
| 33   | GBM       | M   | 23          | Pineal/third ventricle  | no                | no        | Neg                  | No           |
| 34   | GBM       | M   | 16          | Right temporal lobe     | no                | no        | Neg                  | No           |
| 35   | GBM       | F   | 31          | Cerebrum , NOS          | no                | no        | Neg                  | No           |
| 36   | GBM       | M   | 3           | Right temporal lobe     | no                | no        | Neg                  | No           |
| 37   | GBM       | F   | 16          | Cerebellum              | no                | no        | Neg                  | No           |
| 38   | GBM       | F   | 9           | Right parieto-occipital | no                | no        | Neg                  | No           |

**Table S1. Summary of demographics, sequencing, H3K27me3 and H3.3 K27M staining in all pediatric high-grade astrocytomas.**

**Table S2**

| Pediatric brain tumors | n          | H3K27me3 low | H3.3 K27M +ve |
|------------------------|------------|--------------|---------------|
| PA                     | 36         | 0            | 0             |
| SEGA                   | 5          | 0            | 0             |
| Astrocytoma            | 16         | 0            | 0             |
| OD                     | 5          | 0            | 0             |
| DNET                   | 9          | 0            | 0             |
| GG                     | 17         | 0            | 0             |
| MB                     | 24         | 0            | 0             |
| CPP                    | 11         | 0            | 0             |
| CP                     | 3          | 0            | 0             |
| NC                     | 3          | 0            | 0             |
| Men                    | 10         | 0            | 0             |
| AA H3F3A WT            | 2          | 0            | 0             |
| AA H3F3A K27M          | 1          | 1            | 1             |
| GBM H3F3A WT           | 24         | 0            | 0             |
| GBM H3F3A K27M         | 11         | 11           | 11            |
| AT/RT                  | 26         | 5            | 0             |
| <b>Total</b>           | <b>203</b> | <b>17</b>    | <b>12</b>     |
| Adult brain tumors     | n          | H3K27me3 low | H3.3 K27M +ve |
| PA                     | 4          | 0            | 0             |
| GG                     | 2          | 0            | 0             |
| DA                     | 3          | 0            | 0             |
| AA                     | 8          | 0            | 0             |
| OD                     | 3          | 0            | 0             |
| AO                     | 5          | 0            | 0             |
| GBM                    | 13         | 0            | 0             |
| <b>Total</b>           | <b>38</b>  | <b>0</b>     | <b>0</b>      |
| Non-neoplastic tissues | n          | H3K27me3 low | H3.3 K27M +ve |
| Normal brain           | 3          | 0            | 0             |
| Vascular malformations | 4          | 0            | 0             |
| Ischemia               | 4          | 0            | 0             |
| Hemorrhage             | 5          | 0            | 0             |
| CNS malformations      | 5          | 0            | 0             |
| Hippocampal sclerosis  | 5          | 0            | 0             |
| Vasculitis             | 5          | 0            | 0             |
| Demyelinating          | 5          | 0            | 0             |
| Infectious             | 8          | 0            | 0             |
| Metastatic             | 5          | 0            | 0             |
| <b>Total</b>           | <b>49</b>  | <b>0</b>     | <b>0</b>      |

**Table S2. Summary of H3K27me3 and H3.3 K27M staining in all tissue samples.**
